# Supplementary material for: Clinicopathological Characteristics and Prognostic Factors in Ovarian Metastases from Right- and Left-Sided Colorectal Cancer
Source: MDPI journal article supplement (doi:10.3390/curroncol28040255), 2021-08-03
Supplement: s1 [file s1]

**Table S1.** Surgery for STO ( $n = 51$ ).

| Type of procedure                                                               | Concurrent resection of the primary tumor | Number of patients ( $n = 51$ ) |
|---------------------------------------------------------------------------------|-------------------------------------------|---------------------------------|
| Biopsy                                                                          | 0                                         | 1 (2.0%)                        |
| Unilateral adnexectomy                                                          | 6                                         | 10 (19.6%)                      |
| Bilateral adnexectomy                                                           | 4                                         | 10 (19.6%)                      |
| Bilateral adnexectomy, hysterectomy                                             | 7                                         | 16 (31.4%)                      |
| Bilateral adnexectomy, hysterectomy, omentectomy                                | 4                                         | 7 (13.7%)                       |
| Bilateral adnexectomy, hysterectomy, omentectomy, appendectomy                  | 0                                         | 5 (9.8%)                        |
| Bilateral adnexectomy, hysterectomy, omentectomy, appendectomy, lymphadenectomy | 0                                         | 1 (2.0%)                        |
| Palliative surgery (i.e. colonostomy, ileostomy, etc.)                          | 0                                         | 1 (2.0%)                        |

STO – secondary tumor of the ovary.

**Table S2.** Primary tumor characteristics ( $n = 51$ ).

| Characteristics                  | Right-sided ( $n = 20$ ) | Left-sided ( $n = 31$ ) | Total ( $n = 51$ ) |
|----------------------------------|--------------------------|-------------------------|--------------------|
| Initial disease stage            |                          |                         |                    |
| I                                | 0                        | 1                       | 1 (2.0%)           |
| II                               | 1                        | 5                       | 6 (11.8%)          |
| III                              | 3                        | 4                       | 7 (13.7%)          |
| IV                               | 16                       | 21                      | 37 (72.5%)         |
| Primary tumor stage              |                          |                         |                    |
| ≤ T3                             | 9                        | 16                      | 25 (49.0%)         |
| T4                               | 9                        | 12                      | 21 (41.2%)         |
| Unknown                          | 2                        | 3                       | 5 (9.8%)           |
| Regional lymph nodes             |                          |                         |                    |
| Positive                         | 9                        | 21                      | 30 (58.8%)         |
| Negative                         | 11                       | 10                      | 21 (41.2%)         |
| Histology                        |                          |                         |                    |
| Adenocarcinoma NOS               | 7                        | 28                      | 35 (68.6%)         |
| Mucinous adenocarcinoma          | 12                       | 1                       | 13 (25.5%)         |
| Poorly cohesive/signet-ring cell | 0                        | 1                       | 1 (2.0%)           |
| Unknown                          | 1                        | 1                       | 2 (3.9%)           |
| Tumor grade                      |                          |                         |                    |
| 1                                | 2                        | 0                       | 2 (4.1%)           |
| 2                                | 12                       | 18                      | 30 (61.2%)         |
| 3                                | 5                        | 12                      | 17 (34.7%)         |
| Unknown                          | 1                        | 1                       | 2 (3.9%)           |
| Mucinous component               |                          |                         |                    |
| Present                          | 12                       | 6                       | 18 (36.7%)         |
| Absent                           | 7                        | 25                      | 31 (63.3%)         |
| Unknown                          | 1                        | 0                       | 1 (2.0%)           |
| Primary tumor site (ICD code)    |                          |                         |                    |
| Colon total (C18)                |                          |                         | 44 (86.3%)         |
| Coecum (C18.0)                   |                          |                         | 7 (13.7%)          |
| Appendix (C18.1)                 |                          |                         | 5 (9.8%)           |

|                             |            |
|-----------------------------|------------|
| Ascending colon (C18.2)     | 6 (11.8%)  |
| Hepatic flexure (C18.3)     | 2 (3.9%)   |
| Transverse colon (C18.4)    | 0 (0%)     |
| Splenic flexure (C18.5)     | 2 (3.9%)   |
| Descending colon (C18.6)    | 0 (0%)     |
| Sigmoid colon (C18.7)       | 14 (27.5%) |
| Rectosigmoid junction (C19) | 8 (15.7%)  |
| Rectum (C20)                | 7 (13.7%)  |

ICD—International Classification of Diseases, NOS – not otherwise specified.

**Table S3.** Imaging methods and their comparison with histopathological findings.

|                                                |            |
|------------------------------------------------|------------|
| Imaging methods available                      | 46 (90.2%) |
| Imaging methods used <sup>1</sup>              |            |
| CT                                             | 37 (80.4%) |
| MRI                                            | 6 (13.0%)  |
| US                                             | 5 (10.9%)  |
| PET/CT                                         | 3 (6.5%)   |
| Suggestion of imaging methods                  |            |
| Primary ovarian cancer                         | 21 (45.7%) |
| STO                                            | 25 (54.3%) |
| Findings on imaging methods                    |            |
| No visible adnexal mass                        | 6 (13.0%)  |
| Pelvic mass <sup>2</sup>                       | 12 (26.1%) |
| Unilateral adnexal mass                        | 19 (41.3%) |
| Bilateral adnexal mass                         | 9 (19.6%)  |
| Accuracy of imaging methods                    |            |
| Correctly evaluated                            | 21 (45.7%) |
| Bilateral misdiagnosed as unilateral           | 7 (15.2%)  |
| Information on laterality missing <sup>2</sup> | 12 (26.1%) |
| No visible adnexal mass                        | 6 (13.0%)  |

Imaging methods were available in 46/51 (90.2%) patients, <sup>1</sup> multiple imaging methods in one patients might have been used, <sup>2</sup> reported as pelvic mass with no information on laterality.

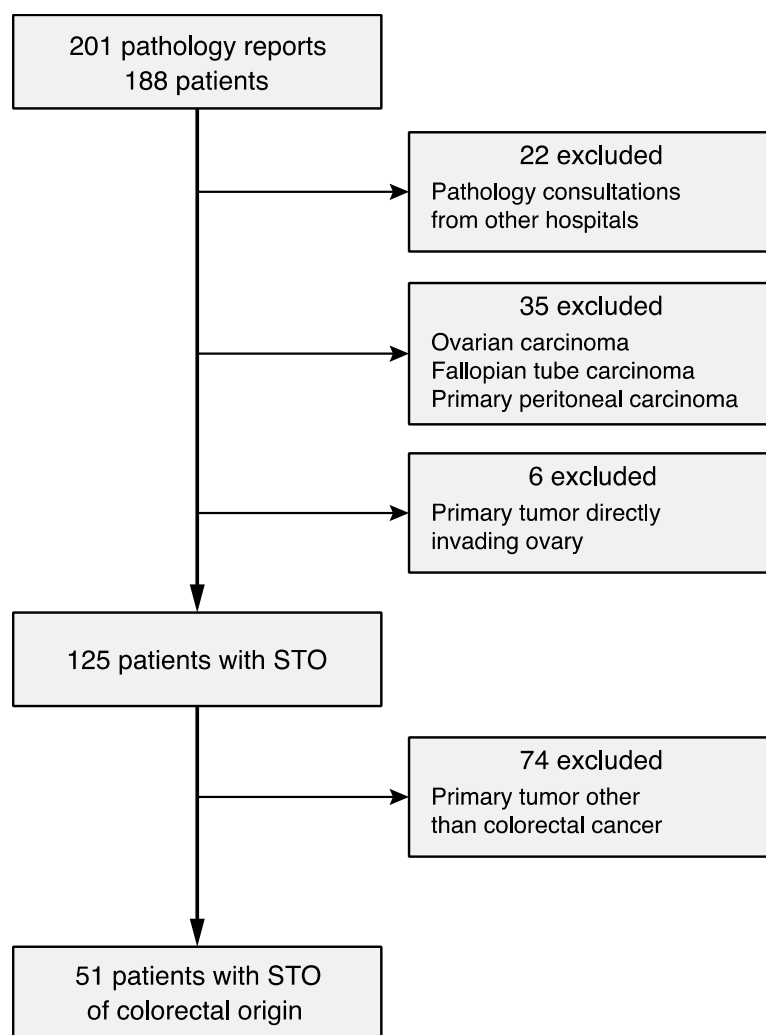

**Figure S1.** Flow chart of exclusion process.
